# Supplementary material for: A bioswitchable siRNA delivery system: RNAi therapy based on tetrahedral framework nucleic acids for bone defect repair
Source: Royal Society of Chemistry journal article supplement (doi:10.1039/d4nr04105d), 2024-01-01
Supplement: d4nr04105d1.pdf [file d4nr04105d1.pdf]

## Supporting Information

# **A Bioswitchable siRNA Delivery System: RNAi Therapy Based on Tetrahedral Framework Nucleic Acids for Bone Defect Repair**

*Shengnan Liao,<sup>1,4</sup> Songhang Li,<sup>1</sup> Zhiqiang Liu,<sup>1</sup> Weitong Lu,<sup>1</sup> Yutian He,<sup>1</sup> Kai Xia,<sup>1,4</sup>  
Yigan Wang,<sup>1,4</sup> Zhihe Zhao,<sup>\*1,4</sup> and Yunfeng Lin<sup>\*1,2,3</sup>*

AUTHOR ADDRESS:

<sup>1</sup>State Key Laboratory of Oral Diseases, National Center for Stomatology, National Clinical Research Center for Oral Diseases, West China Hospital of Stomatology, Sichuan University, Chengdu, Sichuan 610041, China

<sup>2</sup>Sichuan Provincial Engineering Research Center of Oral Biomaterials, Chengdu, Sichuan 610041, China

<sup>3</sup>National Center for Translational Medicine, Shanghai Jiao Tong University, Shanghai 200240, China

<sup>4</sup>Department of Orthodontics, West China Hospital of Stomatology, Sichuan University, Chengdu, China.

\* Corresponding author: Zhihe Zhao, Yunfeng Lin

Mailing address: South Renmin Road, Section 3, No.14, Chengdu, China

Phone: 86-28-85503487      E-mail: zhzhao@scu.edu.cn; yunfenglin@scu.edu.cn

| Oligonucleoti<br>des Name | Sequence (5'-3')                                                    |
|---------------------------|---------------------------------------------------------------------|
| <b>BiRDS</b>              |                                                                     |
| S1                        | ggacuuggAGGATGGGCATGCTCTTCCCGACGGTATTGGACCCTCGCAT<br>GAgcaaggaaTAAG |
| S2                        | ggacuuggACATGCGAGGGTCCAATACCGACGATTACAGCTTGCTACA<br>CGAgcaaggaaTAAG |
| S3                        | ggacuuggACGTGTAGCAAGCTGTAATCGACGGGAAGAGCATGCCCAT<br>CCAgcaaggaaTAAG |
| siRNA                     | uuccuugcuaccaaguccuua                                               |
| Cy5-siRNA                 | Cy5- uuccuugcuaccaaguccuua                                          |
| Cy5-siRNA-<br>BHQ         | Cy5- uuccuugcuaccaaguccuua-BHQ                                      |
| <b>tFNA</b>               |                                                                     |
| S1                        | ATTTATCACCCGCCATAGTAGACGTATCACCAGGCAGTTGAGA<br>CGAACATTCCTAAGTCTGAA |
| S2                        | ACATGCGAGGGTCCAATACCGACGATTACAGCTTGCTACACGA<br>TTCAGACTTAGGAATGTTCG |
| S3                        | ACTACTATGGCGGGTGATAAAACGTGTAGCAAGCTGTAATCGA<br>CGGGAAGAGCATGCCCATCC |
| S4                        | ACGGTATTGGACCCTCGCATGACTCAACTGCCTGGTGATACGA<br>GGATGGGCATGCTCTTCCCG |

**Table S1.** Sequences of the Oligonucleotides used in this study

| Primer Name | Sequences from 5' to 3'         |
|-------------|---------------------------------|
| CKIP-1      | Forward AGAGCGGACTCAGACAGGAT    |
|             | Reverse TGGGTA ACTTCTTCAGTGCTTG |
| GAPDH       | Forward ACAGCAACAGGGTGGTGGAC    |
|             | Reverse TTTGAGGGTGCAGCGAACTT    |

**Table S2.** The primer sequences used in this study.

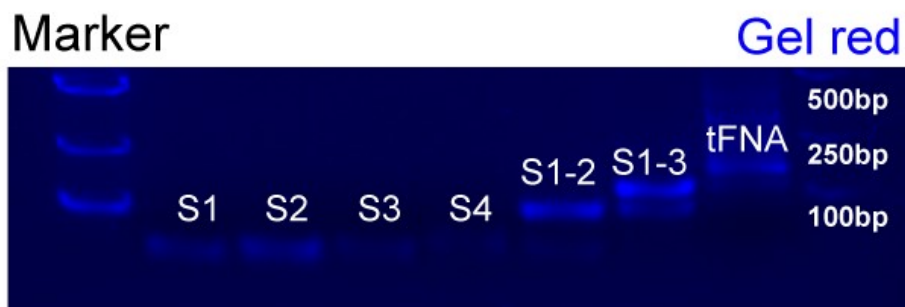

**Figure S1.** Verification of the stepwise loading process of tFNA in AGE. As shown in the gel images, the lanes 1-8 (from left to right) represent S1, S2, S3, S4, S1-2, S1-3 and tFNA, respectively.

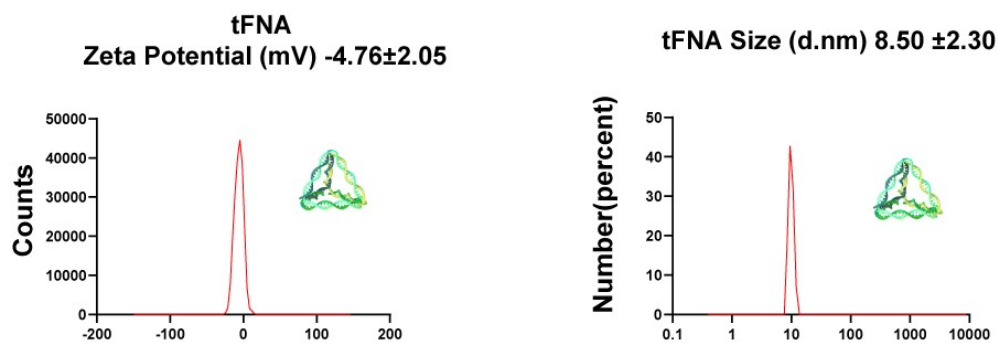

**Figure S2.** Zeta potential and molecular size of tFNA.

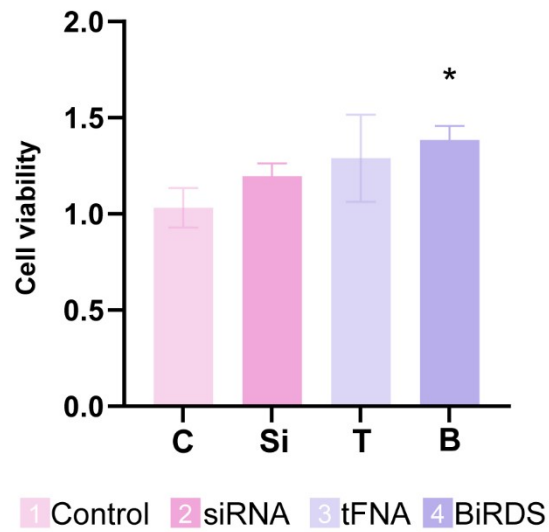

**Figure S3.** Cell viability assays by CCK-8 experiments. Data are presented as mean  $\pm$  SD (n =3). Statistical method compared between groups involved one-way analysis of variance (ANOVA) and post-hoc analysis (Sidak. Test). Statistical analysis: \*P < 0.05, \*\*P < 0.01, \*\*\*P < 0.001, #P < 0.05, ###P < 0.01, ####P < 0.001. \*: control group versus other groups, #: siRNA group versus other groups.

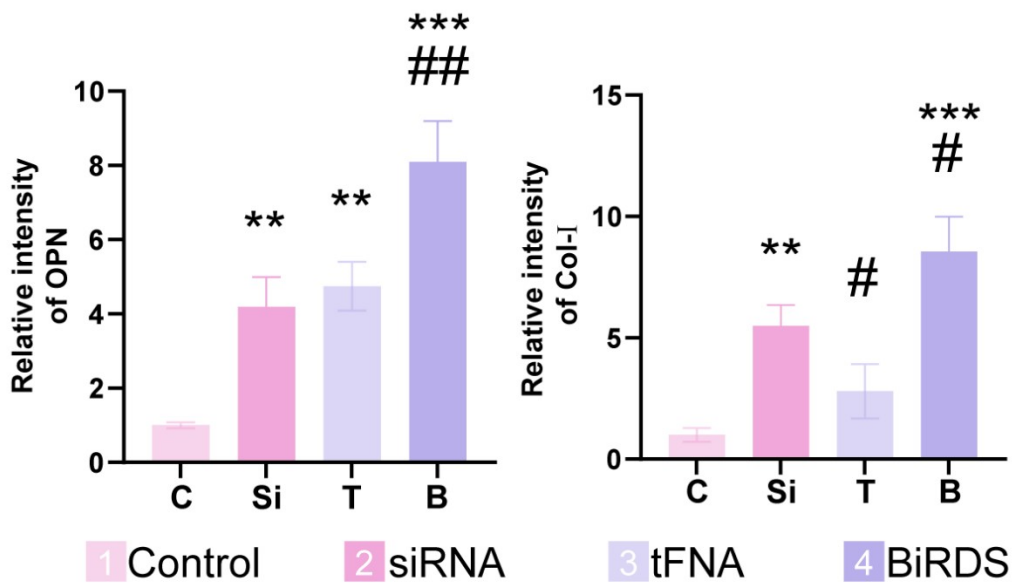

**Figure S4.** The semi-quantitative analysis of relative fluorescence intensity of OPN and Col-I. Data are presented as mean  $\pm$  SD (n =3). Statistical method compared between groups involved one-way analysis of variance (ANOVA) and post-hoc analysis (Sidak. Test). Statistical analysis: \*P < 0.05, \*\*P < 0.01, \*\*\*P < 0.001, #P < 0.05, ##P < 0.01, ###P < 0.001. \*: control group versus other groups, #: siRNA group versus other groups.

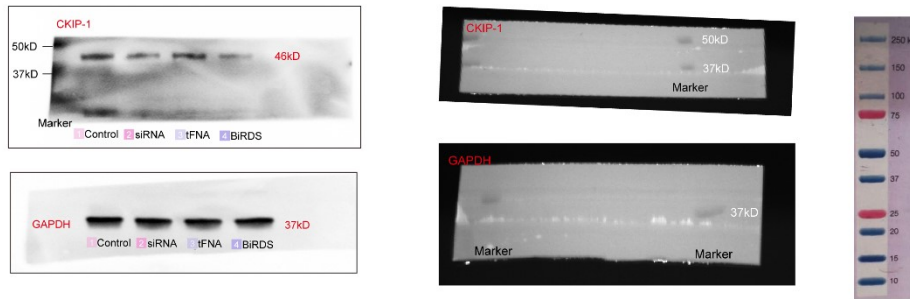

**Figure S5.** The raw data for the western blotting protein bands for Figure 2F (CKIP-1 and GAPDH).

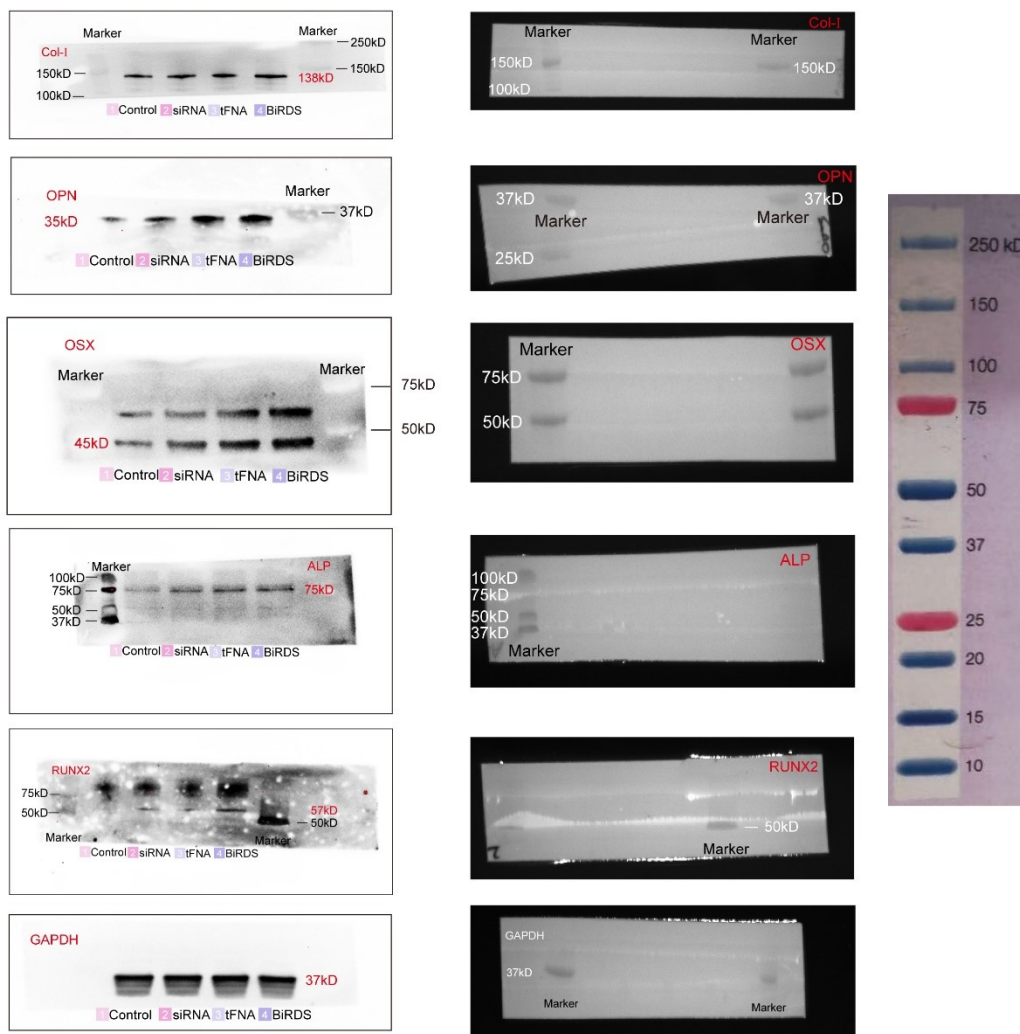

**Figure S6.** The raw data for the western blotting protein bands for Figure 3D (Col-I, OPN, OSX, ALP, RUNX2 and GAPDH).
